# Supplementary material
Source: PubMed Central journal article supplement (PMC2568902)
Supplement: M800630200_1.pdf [file M800630200_1.pdf]

## **Supplemental information to:**

# **DUAL ROLES OF AN ESSENTIAL CYSTEINE RESIDUE IN ACTIVITY OF A REDOX-REGULATED BACTERIAL TRANSCRIPTIONAL ACTIVATOR**

Nirupama Gupta<sup>1</sup> and Stephen W. Ragsdale<sup>1\*</sup>

<sup>1</sup> Department of Biological Chemistry, University of Michigan, Ann Arbor, MI 48109-0606

\*Corresponding author: Department of Biological Chemistry, University of Michigan, University of Michigan Medical School, 5301 MSRB III, 1150 W. Medical Center Drive, Ann Arbor, MI 48109-0606. Phone: (734) 615-4621; Fax: (734) 763-4581; email: sragdsal@umich.edu

**Supplementary Figure 1. Parent ion analysis of CprK by mass spectrometry.** Mass spectrometric analysis confirmed that CprK and variants are full-length proteins, with wild-type CprK (A) showing a mass of 28026.0 Da, C11S (B) of 28015.0 Da, and C11D (C) of 28040.0 Da.

**Supplementary Figure 2. Stability of wild-type CprK and Cys11 variants.** Melting curves of wild-type and variant proteins were obtained by recording the CD at 222 nm from 20°C to 80°C in a buffer containing 50 mM Tris, 300 mM NaCl, and pH 7.5.

**Supplementary Figure 3. Circular dichroism analysis.** Superimposed CD spectra of WT, C11S and C11D variants. Data presented are representative of three independent experiments. Samples were prepared in 10 mM potassium phosphate buffer, pH 7.5.

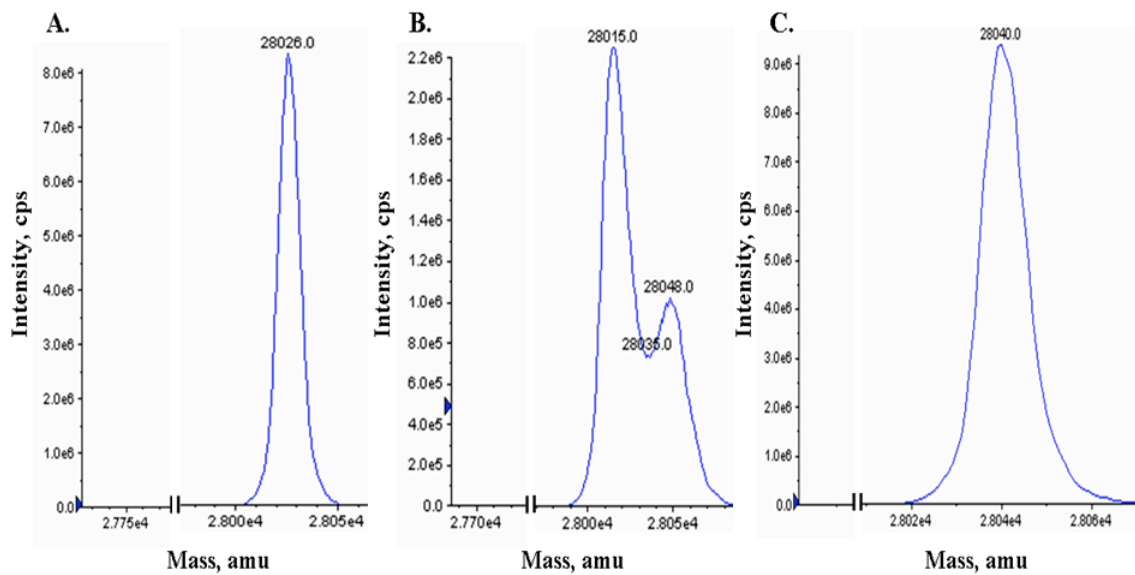

Supplementary Figure 1

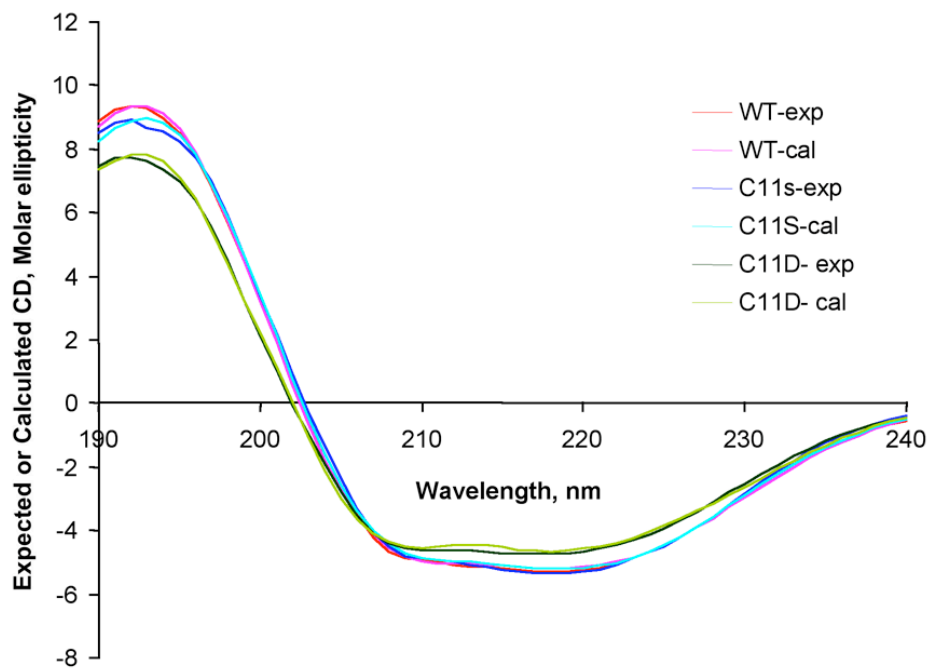

Supplementary Figure 2

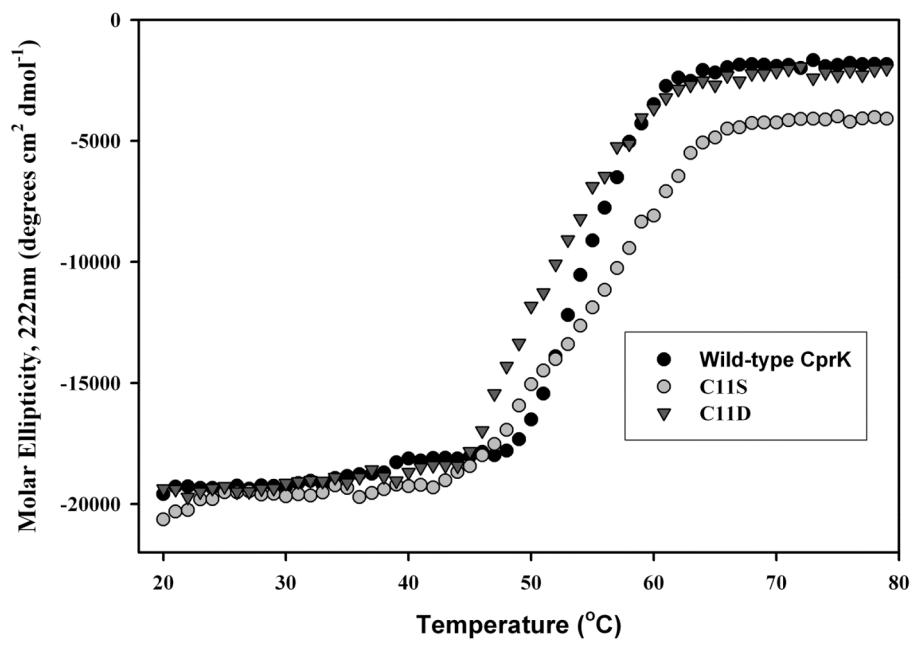

Supplementary Figure 3
